# Supplementary material
Source: publisher site journal article supplement (https://www.dovepress.com/get_supplementary_file.php?f=235664T2.docx)
Supplement: Supplementary file 1 [file get_supplementary_file.php]

| **R Code** | **R Version** |
| --- | --- |
| #source("http://bioconductor.org/biocLite.R") #biocLite("limma") logFoldChange=2 adjustP=0.05 library(limma) setwd("C:\\ diff") rt=read.table("Gene.txt",sep="\t",header=T,check.names=F) rt=as.matrix(rt) rownames(rt)=rt[,1] exp=rt[,2:ncol(rt)] dimnames=list(rownames(exp),colnames(exp)) rt=matrix(as.numeric(as.matrix(exp)),nrow=nrow(exp),dimnames=dimnames) rt=avereps(rt) rt=normalizeBetweenArrays(as.matrix(rt)) #rt=log2(rt+1) #differential modType=c(rep("1"n,),rep("2",N)) design <- model.matrix(~0+factor(modType)) colnames(design) <- c("1","2") fit <- lmFit(rt,design) cont.matrix<-makeContrasts(treat-con,levels=design) fit2 <- contrasts.fit(fit, cont.matrix) fit2 <- eBayes(fit2) allDiff=topTable(fit2,adjust='fdr',number=200000) write.table(allDiff,file="limmaTab.xls",sep="\t",quote=F) #write table diffSig <- allDiff[with(allDiff, (abs(logFC)>logFoldChange & adj.P.Val < adjustP )), ] write.table(diffSig,file="diff.xls",sep="\t",quote=F) diffUp <- allDiff[with(allDiff, (logFC>logFoldChange & adj.P.Val < adjustP )), ] write.table(diffUp,file="up.xls",sep="\t",quote=F) diffDown <- allDiff[with(allDiff, (logFC<(-logFoldChange) & adj.P.Val < adjustP )), ] write.table(diffDown,file="down.xls",sep="\t",quote=F) hmExp=rt[rownames(diffSig),] diffExp=rbind(id=colnames(hmExp),hmExp) write.table(diffExp,file="heatmap.txt",sep="\t",quote=F,col.names=F) | 3.6.1 |

Table S2. R code for data processing.
